# Supplementary material for: A new approach to model the spatial and temporal variability of recharge to karst aquifers
Source: Copernicus journal article supplement (doi:10.5194/hess-16-2219-2012), 2012-07-20
Supplement: Supplementary file 1 [file manuscript_supplement.doc]

Split-sample test by bootstrapping

A split sample test using a bootstrapping method was performed by randomly selecting data values representing half of the time series (*Qexp*, *Qseas*, *Cexp*, *CV*) from the whole dataset and calibrating the model as for calibration step 4 (subsection 3.3 of the manuscript). For model validation, the calibrated model was applied to the excluded data set. To account for variability in the time series, the bootstrapping procedure was repeated five times.

In Figure 1, the resulting five parameters sets and validation efficiencies are compared with the parameters and efficiencies derived by all the data in calibration step 4. The positions of the parameters of the bootstrap samples (Figure 1a) indicate that for the parameters *adepth*, *dsoil,max*, *log Kvert,max*, *A*, *Cold* and *Vold,max* the automatic calibration results in similar parameters values as for the whole set of observations. The same is true for *depi,max* except for one bootstrap sample. The other parameters show a much higher variability, sometimes covering the entire (e.g. log *Klat,max*) or a certain part of the parameter range (e.g. *nepi*). These results are in accordance with the parameter distributions shown in Fig. 5 in the manuscript: parameters that show a larger spread in our bootstrap test also show a low identifiability in their parameter distributions: for instance, *Klat,max* shows a uniform distribution, while *nepi* has a constant slope only at the second two thirds of its range, similar to its positions visible by the bootstrap calibration. Hence, the split-sample test by bootstrapping did not provide new information about the identifiability of the parameters and the reasons for a larger or smaller parameter spread are already discussed in subsection 5.3 of the manuscript.

The individual efficiencies in Figure 1b show that for most of the bootstrap samples, the efficiency of the validation data set is inferior to the efficiencies in the calibration step 4. A slight decrease of efficiency for the validation data set is likely for every hydrological model , but a large decrease of the efficiency indicates a model deficiency. This seems to be true for *NSC,exp*, although the hydrochemical parameters, *Cold* and *Vold,max*, do not change much compared to calibration step 4. The reason for this can again be found in the heterogeneity of our time series. During the first day of the sprinkling (see Fig. 2 of the manuscript) only two tracer observations showed that tracer responded already at the first day of sprinkling. If these two measurements are not part of the calibration sample, they are not considered in the parameter calibration and the model tends to simulate a first tracer reaction only when the second day of sprinkling began. In that case, these two measurements result in a strong decrease of *NSC,exp* for the validation period. Hence, the split-sample test by bootstrapping showed that especially tracer predictions are very sensitive to changes in the model input. This was already suggested by varying the number of model compartments (see subsection 5.4 of the manuscript).

References

Perrin, C., Michel, C., and Andréassian, V.: Does a large number of parameters enhance model performance? Comparative assessment of common catchment model structures on 429 catchments, Journal of Hydrology, 241, 275-301, 2001.


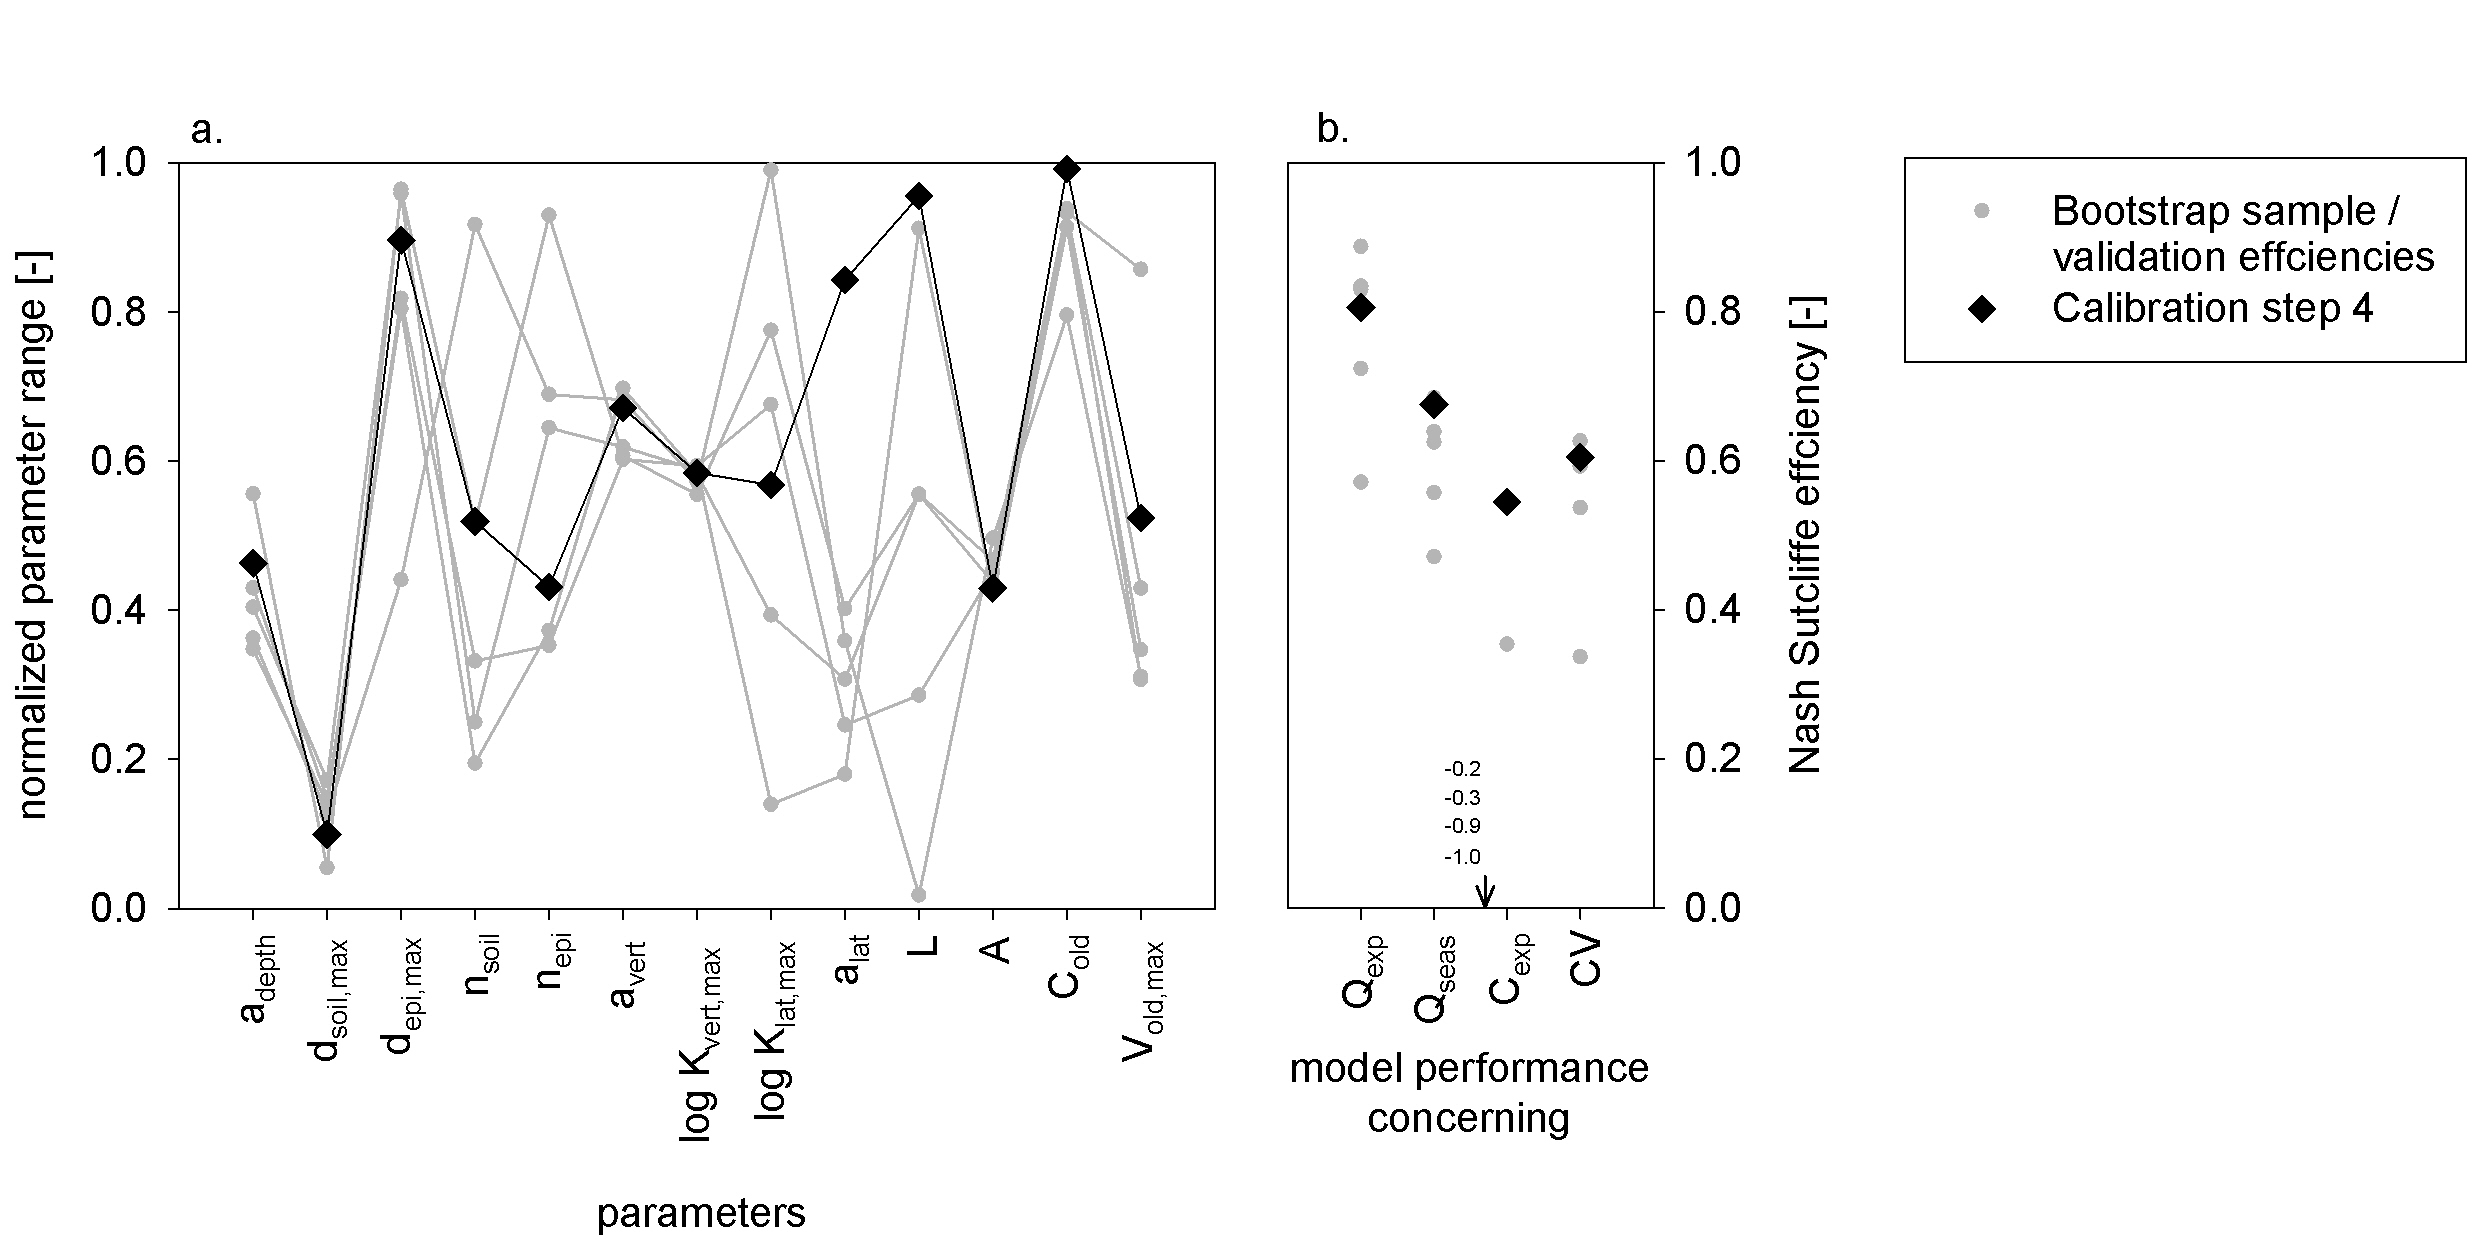


Figure 1. Results of split-sample test and calibration step 4 using five bootstrap samples from the observations: (a) calibration parameters and (b) efficiencies with the validation data sets (remaining 50% of observations that was not used for calibration)
